# Supplementary material for: Genomic dissection of maternal, additive and non-additive genetic effects for growth and carcass traits in Nile tilapia
Source: Springer Nature journal article supplement (doi:10.1186/s12711-019-0522-2), 2020-01-15
Supplement: MOESM1 [file 12711_2019_522_MOESM1_ESM.pdf]

[Additional file 1: Supplementary Tables](#)

Genomic dissection of maternal, additive and non-additive genetic effects for growth and carcass traits in Nile tilapia

**R Joshi, THE Meuwissen, JA Woolliams and HM Gjøen**

**Table S1:** Number of animals genotyped in different full-sib families.

|    |   | 1  | 2  | 3  | 4 | 5 | 6  | 7  | 8  | 9 | 10 | 11 | 12 | 13 | 14 | 15 | 16 | 17 | 18 |
|----|---|----|----|----|---|---|----|----|----|---|----|----|----|----|----|----|----|----|----|
| 1  | P |    |    |    | 5 | 9 |    | 30 |    | 5 | 5  | 26 | 26 |    | 34 |    | 15 | 35 |    |
|    | G |    |    |    |   |   |    |    |    |   |    |    |    |    |    |    |    |    |    |
| 2  | P | 30 | 20 | 18 |   |   | 11 |    | 33 |   |    |    |    | 9  |    | 3  |    |    | 16 |
|    | G | 30 | 20 | 18 |   |   | 11 |    |    |   |    |    |    | 8  |    |    |    |    |    |
| 3  | P | 29 | 18 | 25 |   |   | 6  |    | 36 |   |    |    |    | 8  |    | 13 |    |    | 36 |
|    | G |    |    |    |   |   |    |    |    |   |    |    |    |    |    |    |    |    |    |
| 4  | P | 13 | 7  | 19 |   |   | 6  |    | 23 |   |    |    |    | 11 |    | 6  |    |    | 14 |
|    | G |    |    |    |   |   |    |    |    |   |    |    |    |    |    |    |    |    |    |
| 5  | P |    |    |    |   |   |    | 6  |    | 8 | 7  | 20 | 12 |    | 25 |    | 10 | 27 |    |
|    | G |    |    |    |   |   |    | 6  |    | 8 | 7  | 20 |    |    | 21 |    | 10 | 27 |    |
| 6  | P |    |    |    | 3 | 6 |    | 46 |    | 8 | 4  | 39 | 44 |    | 59 |    | 17 | 54 |    |
|    | G |    |    |    |   |   |    | 41 |    | 8 | 4  | 39 |    |    | 38 |    | 17 | 44 |    |
| 7  | P | 32 | 9  | 17 |   |   | 8  |    | 32 |   |    |    |    | 7  |    | 2  |    |    | 30 |
|    | G | 32 | 9  | 17 |   |   | 8  |    |    |   |    |    |    | 7  |    |    |    |    |    |
| 8  | P |    |    |    | 5 | 3 |    | 24 |    | 9 | 3  | 13 | 13 |    | 19 |    | 8  | 16 |    |
|    | G |    |    |    |   |   |    | 25 |    | 8 | 3  | 13 |    |    | 10 |    | 8  | 16 |    |
| 9  | P | 29 | 16 | 26 |   |   | 9  |    | 37 |   |    |    |    | 11 |    | 3  |    |    | 27 |
|    | G | 29 | 15 | 26 |   |   | 9  |    |    |   |    |    |    | 11 |    |    |    |    |    |
| 10 | P | 35 | 27 | 16 |   |   | 8  |    | 38 |   |    |    |    | 17 |    | 6  |    |    | 30 |
|    | G |    |    |    |   |   |    |    |    |   |    |    |    |    |    |    |    |    |    |
| 11 | P |    |    |    | 1 | 2 |    | 13 |    | 2 | 1  | 8  | 13 |    | 22 |    | 8  | 21 |    |
|    | G |    |    |    |   |   |    |    |    |   |    |    |    |    |    |    |    |    |    |
| 12 | P |    |    |    | 4 | 2 |    | 36 |    | 4 | 3  | 10 | 30 |    | 47 |    | 10 | 52 |    |
|    | G |    |    |    |   |   |    | 36 |    | 4 | 3  | 10 |    |    | 34 |    | 8  | 43 |    |
| 13 | P | 19 | 3  | 14 |   |   | 3  |    | 19 |   |    |    |    | 7  |    | 1  |    |    | 10 |
|    | G | 19 | 3  | 14 |   |   | 3  |    |    |   |    |    |    | 7  |    |    |    |    |    |
| 14 | P |    |    |    | 2 | 6 |    | 14 |    |   |    | 16 | 13 |    | 15 |    | 12 | 45 |    |
|    | G |    |    |    |   |   |    | 14 |    |   |    | 16 |    |    | 9  |    | 12 | 43 |    |
| 15 | P | 16 | 15 | 22 |   |   | 6  |    | 28 |   |    |    |    | 12 |    | 4  |    |    | 29 |
|    | G | 16 | 15 | 20 |   |   | 6  |    | 1  |   |    |    |    | 12 |    |    |    |    |    |
| 16 | P | 22 | 13 | 17 |   |   | 4  |    | 26 |   |    |    |    | 15 |    | 3  |    |    | 17 |
|    | G | 22 | 13 | 17 |   |   | 5  |    | 1  |   |    |    |    | 16 |    |    |    |    | 1  |
| 17 | P |    |    |    |   | 4 |    | 17 |    | 4 | 6  | 17 | 17 |    | 34 |    | 7  | 4  |    |
|    | G |    |    |    |   |   |    |    |    |   |    |    |    |    |    |    |    |    |    |
| 18 | P |    |    |    |   |   |    | 14 |    | 6 | 3  | 12 | 22 |    | 15 |    | 8  | 18 |    |
|    | G |    |    |    |   |   |    | 14 |    | 6 | 3  | 12 | 1  |    | 13 |    | 7  | 17 |    |

The rows with P and G denote the total number of phenotyped (coded black) and genotyped animals (coded blue) respectively from each full-sib family. Parents are coded from 1 to 18 in the header rows and columns. Empty cells mean no phenotypes or genotypes were available for that full-sib family.

**Table S2:** Descriptive statistics for the six traits.

|            | <b>N</b> | <b>Unit</b> | <b>Min</b> | <b>Max</b> | <b>Median</b> | <b>Mean (SE)</b> | <b>SD</b> | <b>CV%</b> |
|------------|----------|-------------|------------|------------|---------------|------------------|-----------|------------|
| <b>BWH</b> | 1119     | g           | 115.60     | 802.80     | 390.20        | 407.31 (3.84)    | 128.44    | 31.53      |
| <b>BL</b>  | 1119     | cm          | 14.10      | 28.00      | 22.40         | 22.38 (0.07)     | 2.25      | 10.05      |
| <b>BD</b>  | 1119     | cm          | 5.00       | 12.00      | 8.80          | 8.89 (0.03)      | 1.03      | 11.58      |
| <b>BT</b>  | 1119     | mm          | 12.90      | 59.70      | 40.50         | 40.70 (0.14)     | 4.55      | 11.17      |
| <b>FW</b>  | 1119     | g           | 20.10      | 342.60     | 136.60        | 143.83 (1.56)    | 52.32     | 36.38      |
| <b>FY</b>  | 1119     | %           | 15.24      | 50.53      | 33.15         | 32.83 (0.09)     | 3.13      | 9.54       |

N is the number of observations having both phenotypes and genotypes, SD is the standard deviation, SE is the standard error and CV is the coefficient of variation expressed as percentage.

**Table S3:** Mean values of the genomic relationship matrices constructed with NOIA and HWE approaches.

|               | <b>HWE</b>     |                 |                     | <b>NOIA</b>    |                 |                     |
|---------------|----------------|-----------------|---------------------|----------------|-----------------|---------------------|
|               | <b>Overall</b> | <b>Diagonal</b> | <b>Off-diagonal</b> | <b>Overall</b> | <b>Diagonal</b> | <b>Off-diagonal</b> |
| <b>G</b>      | 0.000790       | 0.8847333       | -0.000791354        | 0.000893       | 1               | -0.000894454        |
| <b>D</b>      | 0.038489       | 0.9250984       | 0.036903020         | 0.000893       | 1               | -0.000894454        |
| <b>k(G#G)</b> | 0.009216       | 0.7868253       | 0.007825131         | 0.011713       | 1               | 0.009945195         |
| <b>k(G#D)</b> | 0.002971       | 0.8211928       | 0.001507525         | 0.003311       | 1               | 0.001528032         |
| <b>k(D#D)</b> | 0.005130       | 0.8581108       | 0.003604039         | 0.004223       | 1               | 0.002441192         |

All relationship matrices are calculated from the 1119 individuals in the study population.

**Table S4:** Transformation of the variances on a similar scale based on the relationship matrices.

| Traits     | Assumption  | $\sigma^2_A$ | SE   | $\sigma^2_{A^*}$ | SE   | $h^2$ | SE   | $h^{2^*}$ | SE   |
|------------|-------------|--------------|------|------------------|------|-------|------|-----------|------|
| <b>BWH</b> | <b>NOIA</b> | 1242         | 300  | 1241             | 300  | 0.18  | 0.04 | 0.19      | 0.04 |
|            | <b>HWE</b>  | 1404         | 339  | 1241             | 300  | 0.20  | 0.04 | 0.19      | 0.04 |
|            | <b>Ped</b>  | 3489         | 1391 | 2527             | 1007 | 0.44  | 0.14 | 0.36      | 0.10 |
| <b>BD</b>  | <b>NOIA</b> | 0.13         | 0.03 | 0.13             | 0.03 | 0.24  | 0.04 | 0.24      | 0.04 |
|            | <b>HWE</b>  | 0.14         | 0.03 | 0.13             | 0.03 | 0.27  | 0.05 | 0.24      | 0.04 |
|            | <b>Ped</b>  | 0.31         | 0.12 | 0.23             | 0.09 | 0.50  | 0.15 | 0.42      | 0.11 |
| <b>BL</b>  | <b>NOIA</b> | 0.40         | 0.12 | 0.40             | 0.12 | 0.13  | 0.04 | 0.13      | 0.04 |
|            | <b>HWE</b>  | 0.46         | 0.14 | 0.40             | 0.12 | 0.14  | 0.04 | 0.13      | 0.03 |
|            | <b>Ped</b>  | 1.20         | 0.50 | 0.87             | 0.36 | 0.33  | 0.12 | 0.26      | 0.08 |
| <b>FW</b>  | <b>NOIA</b> | 177          | 47   | 177              | 47   | 0.15  | 0.04 | 0.16      | 0.04 |
|            | <b>HWE</b>  | 200          | 53   | 177              | 47   | 0.17  | 0.04 | 0.16      | 0.04 |
|            | <b>Ped</b>  | 536          | 215  | 388              | 156  | 0.39  | 0.13 | 0.32      | 0.09 |
| <b>BT</b>  | <b>NOIA</b> | 1.70         | 0.44 | 1.69             | 0.44 | 0.17  | 0.04 | 0.18      | 0.04 |
|            | <b>HWE</b>  | 1.92         | 0.50 | 1.69             | 0.44 | 0.19  | 0.04 | 0.18      | 0.04 |
|            | <b>Ped</b>  | 1.83         | 0.92 | 1.32             | 0.67 | 0.18  | 0.08 | 0.14      | 0.06 |
| <b>FY</b>  | <b>NOIA</b> | 1.76         | 0.41 | 1.76             | 0.41 | 0.19  | 0.04 | 0.19      | 0.04 |
|            | <b>HWE</b>  | 1.99         | 0.46 | 1.76             | 0.41 | 0.21  | 0.04 | 0.19      | 0.04 |
|            | <b>Ped</b>  | 2.65         | 1.17 | 1.92             | 0.85 | 0.26  | 0.10 | 0.21      | 0.07 |

The additive genetic variance ( $\sigma^2_A$ ) and the heritability ( $h^2$ ) were obtained from the A model, but with no individual homozygosity fitted. The transformed variances and ratio are marked by \*, and were obtained from scaling estimates by  $(\overline{\text{diag}(\mathbf{V})} - \bar{\mathbf{V}})$  of the corresponding relationship matrix  $\mathbf{V}$  (see Table S3) as per [1]. In “Ped”, the genomic relationship matrix was replaced by the numerator relationship matrix obtained from 3 generations of pedigree ( $\mathbf{A}$ ).  $\bar{\mathbf{A}}$  and  $\overline{\text{diag}(\mathbf{A})}$  for the 1119 individuals in the study population were 0.2757587 and 1 respectively.

Literature cited:

1. Legarra A. Comparing estimates of genetic variance across different relationship models. *Theor Popul Biol.* Elsevier; 2016;107:26–30.
