# Supplementary material for: Genomic dissection of maternal, additive and non-additive genetic effects for growth and carcass traits in Nile tilapia
Source: Springer Nature journal article supplement (doi:10.1186/s12711-019-0522-2), 2020-01-15
Supplement: MOESM2 [file 12711_2019_522_MOESM2_ESM.pdf]

[Additional file 2: Supplementary Figures](#)

Genomic dissection of maternal, additive and non-additive genetic effects for growth and carcass traits in Nile tilapia

**R Joshi, THE Meuwissen, JA Woolliams and HM Gjøen**

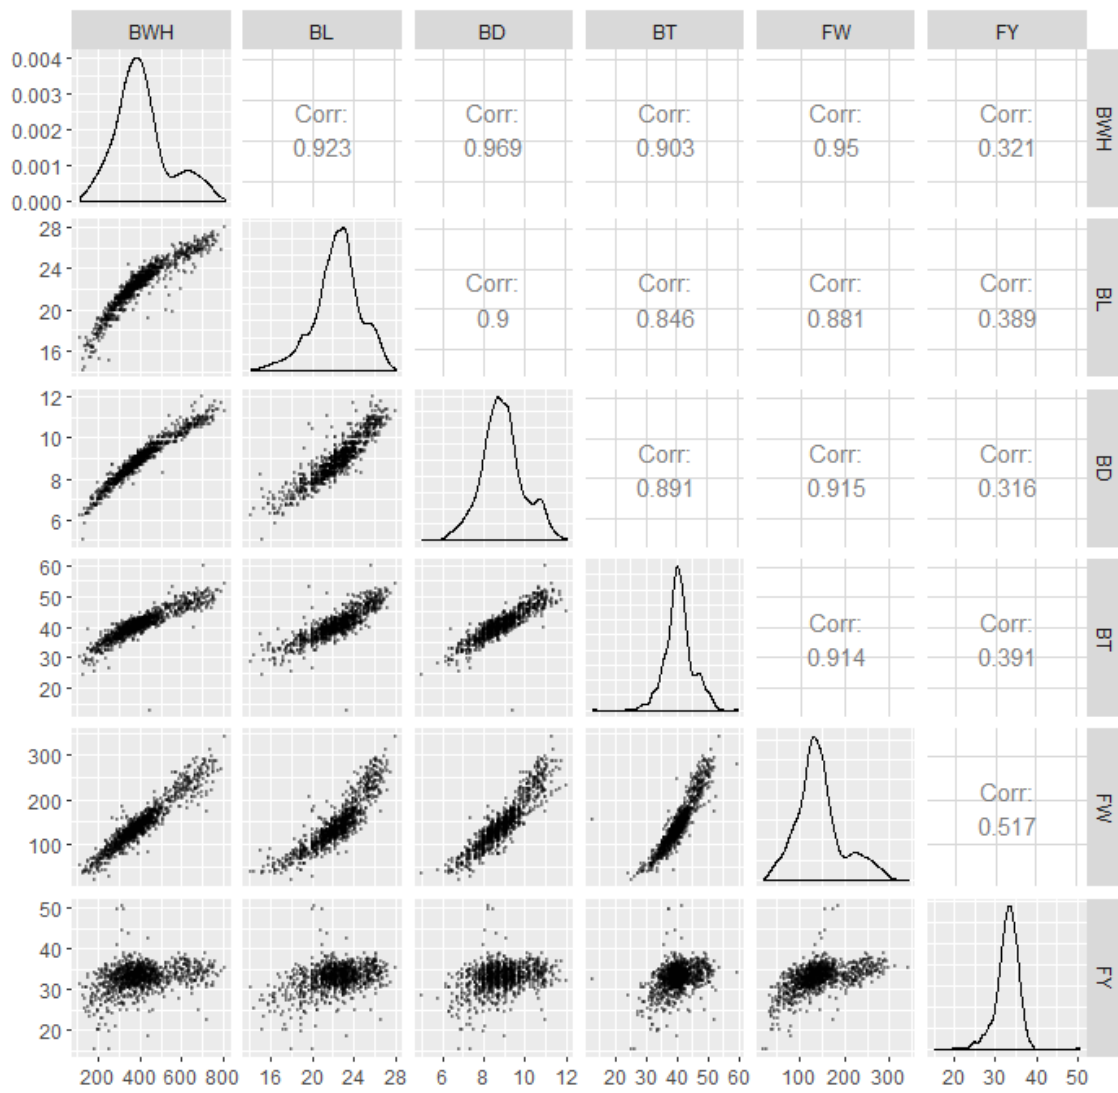

**Figure S1:** Scatterplots, histograms and the phenotypic correlations for the 6 traits studied.

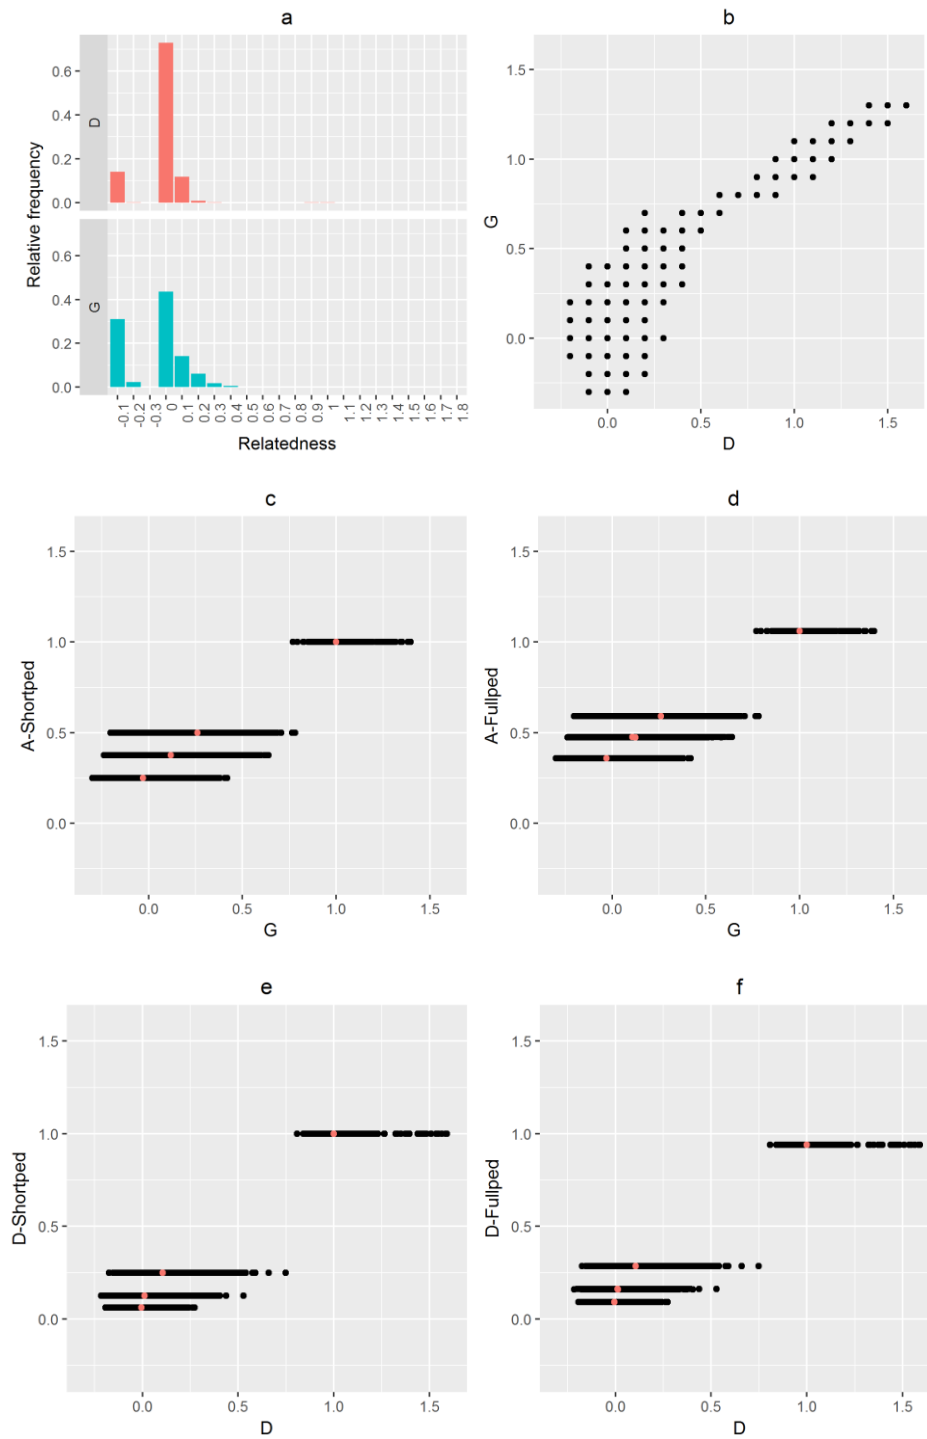

**Figure S2:** Scatterplots for different additive and dominance relationships. **a)** Relative frequency plots for genomic relationships ( $G_{NOIA}$ ) and dominance relationships using genomic information ( $D_{NOIA}$ ). **b)** Scatterplot of  $G_{NOIA}$  with  $D_{NOIA}$  (correlation = 0.47). **c)** Scatterplot of  $G_{NOIA}$  with the pedigree relationships using 3 generations of pedigree (A-Shortped) (correlation = 0.72). **d)** Scatterplot of  $G_{NOIA}$  with the pedigree relationships using 20 generations of pedigree (A-Fullped) (correlation = 0.72). **e)** Scatterplot of  $D_{NOIA}$  with the dominance relationships using 3 generations of pedigree (D-Shortped) (correlation = 0.65). **f)** Scatterplot of  $D_{NOIA}$  with the dominance relationships using 20 generations of pedigree (D-Fullped) (correlation = 0.62). Mean values of  $G_{NOIA}$  and  $D_{NOIA}$  are shown as orange dots in the respective plots.

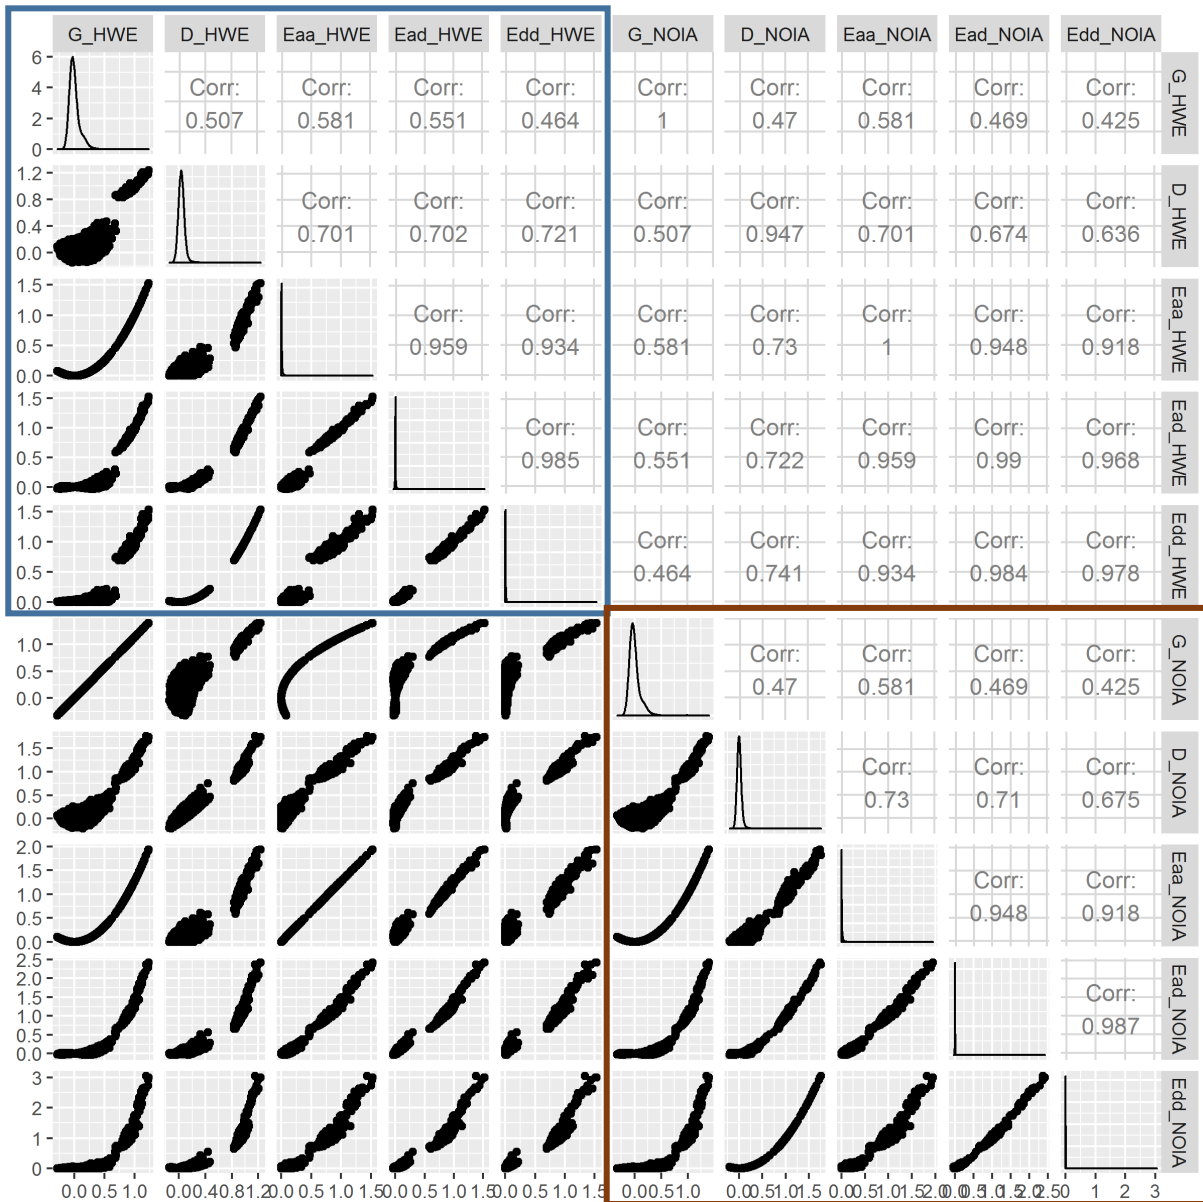

**Figure S3:** Scatterplots for different additive, dominance and epistasis relationships using NOIA (inside brown box) and HWE approaches (inside blue box).

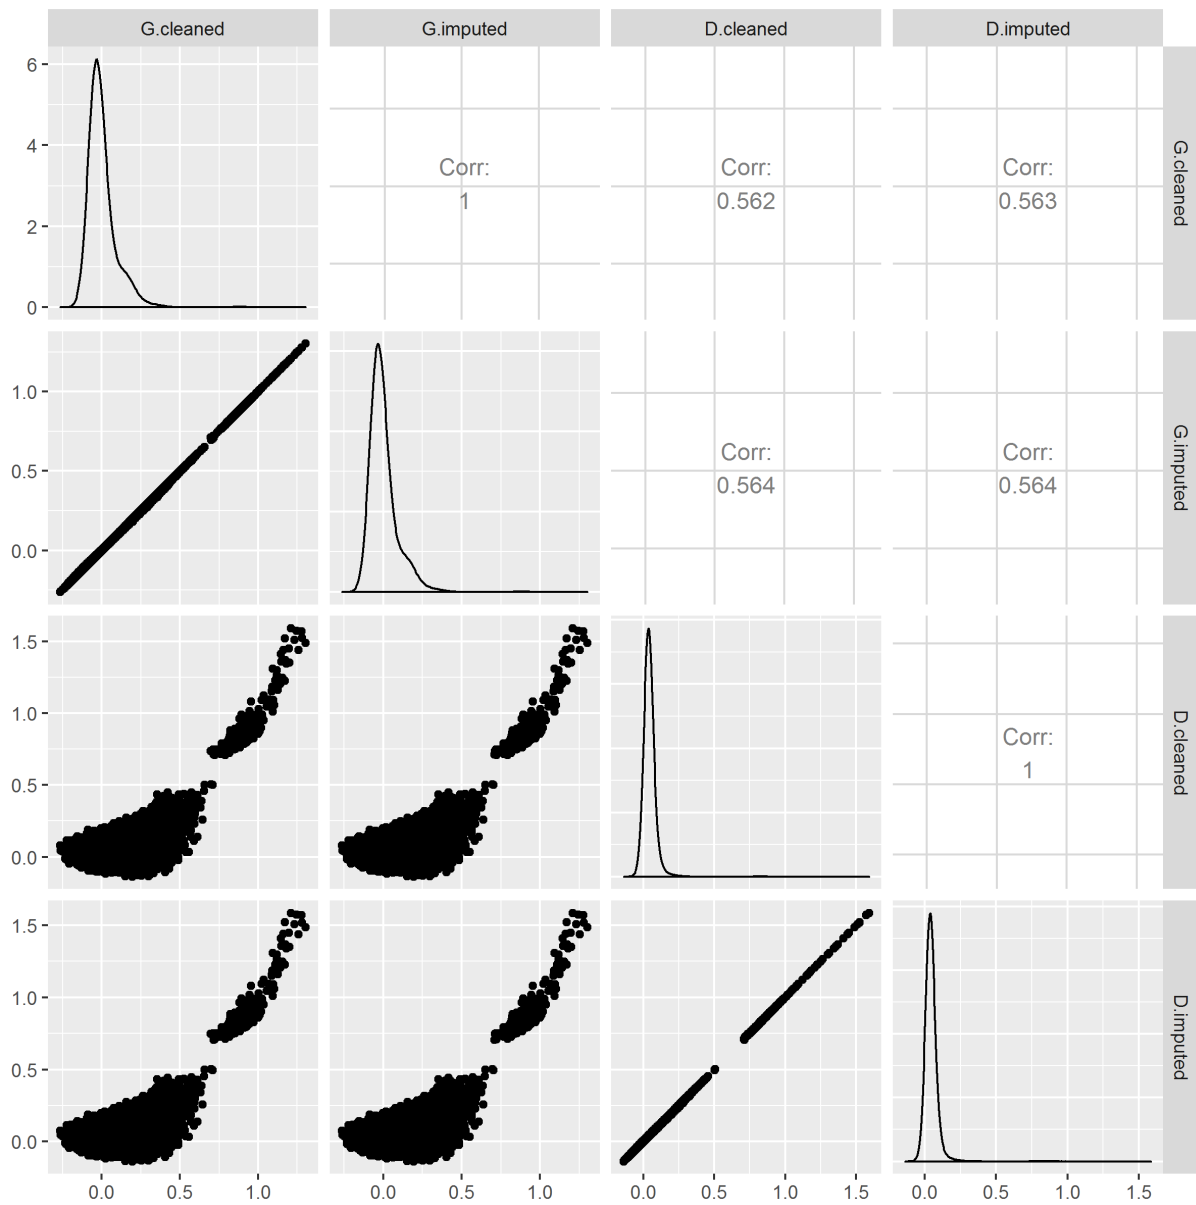

**Figure S4:** Scatterplot and correlation of the additive and dominance relationships using imputed ('G.imputed' and 'D.imputed' respectively) and without imputed genotypes, i.e. with some missing genotypes ('G.cleaned' and 'D.cleaned' respectively).

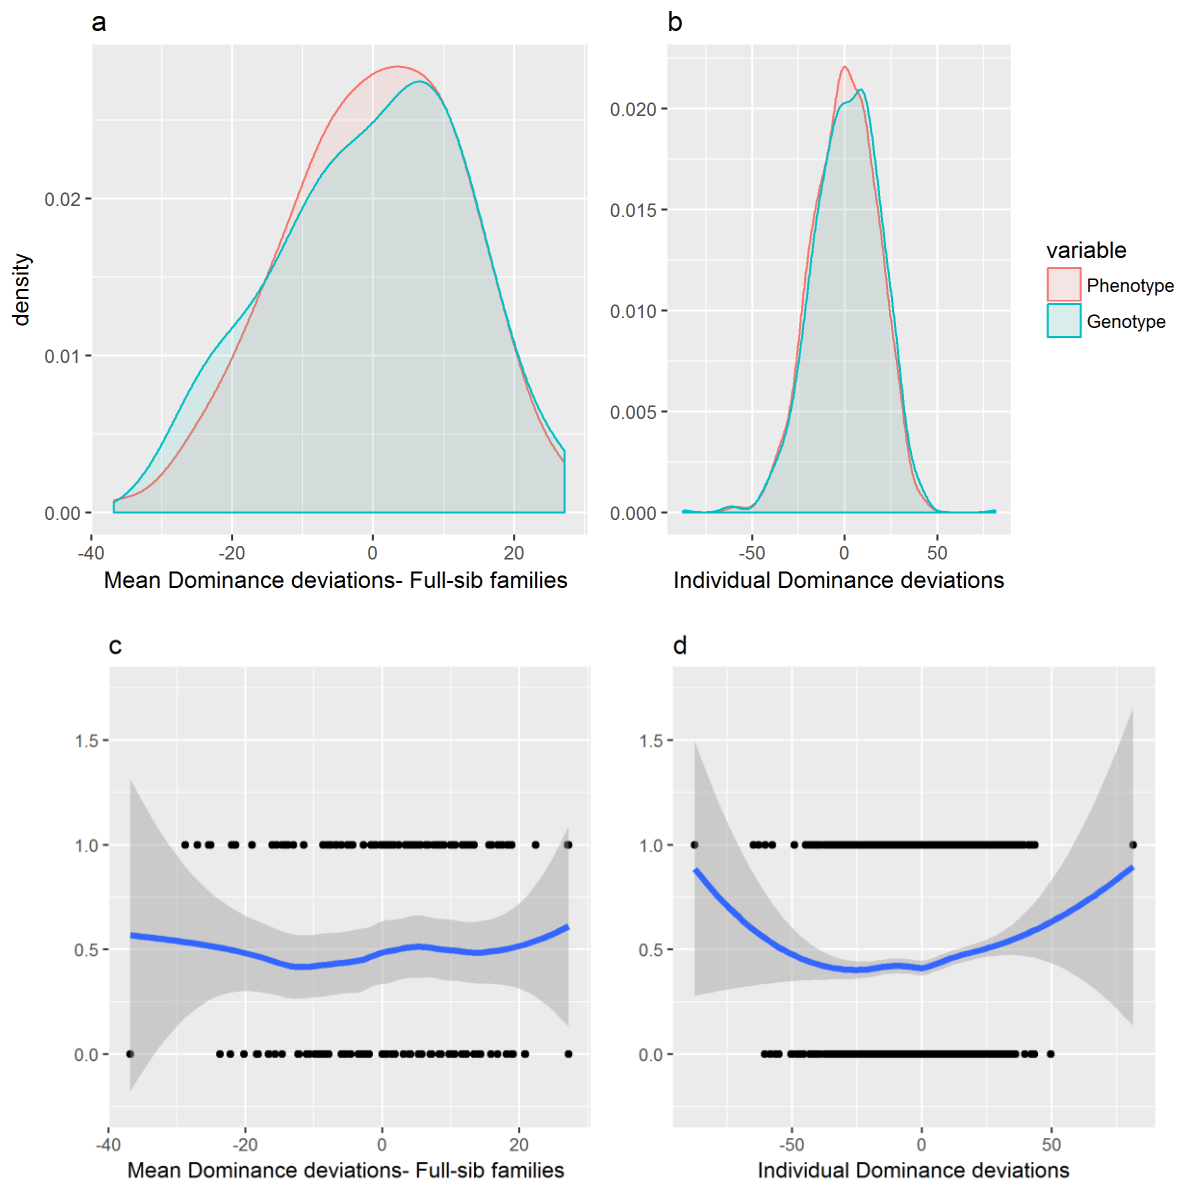

**Figure S5:** Density plots, scatterplot and LOESS regression between the selected and non-selected individuals. **a)** and **b)** are density plots showing the dominance deviations for BWH between the 2524 animals having phenotypes, and the subset of 1119 genotyped individuals included in this study. **c)** and **d)** are scatterplots showing LOESS regressions. In **c)** the 74 full-sib families represented in this study are coded as 1, and the remaining 81 families are coded as 0 and are plotted against the mean family dominance deviation. In **d)** the 1119 individuals included in this study were coded as 1 and the remainder were coded as 0 and are plotted against individual dominance deviations. The dominance deviations were obtained from the ADM model given in [1].

### Literature cited

1. Joshi R, Woolliams JA, Meuwissen THE, Gjøen HM. Maternal, dominance and additive genetic effects in Nile tilapia; influence on growth, fillet yield and body size traits. *Heredity* (Edinb). 2018;120:452-62.
