# Supplementary material for: Genomic dissection of maternal, additive and non-additive genetic effects for growth and carcass traits in Nile tilapia
Source: Genet Sel Evol. 2020 Jan 15;52:1. doi: 10.1186/s12711-019-0522-2 (PMC6964056; doi:10.1186/s12711-019-0522-2)
Supplement: Supplementary file 4 — Additional file 4. Assumptions on the nature of non-additive genetic variance and the impact on estimates of additive genetic variance. The file presents the numerical proof that the estimate of additive genetic variance is reduced when the non-additive variation is assumed to be additive-by-additive epistasis rather than dominance, and this reduction is of the order of 3/8 epistatic variance. [file 12711_2019_522_MOESM4_ESM.pdf]

Additional file 4: Assumptions on the nature of non-additive genetic variance and the impact on estimates of additive genetic variance

Genomic dissection of maternal, additive and non-additive genetic effects for growth and carcass traits in Nile tilapia

**R Joshi, THE Meuwissen, JA Woolliams and HM Gjøen**

Joshi et al. (2018)<sup>1</sup> showed how the variance components of the basic factorial mating design used in this study were translated into estimates of maternal, dominance and additive variances related to a pedigree. The basic factorial mating design had 3 core components ( $V_{\text{Sire}}$ ,  $V_{\text{Dam}}$ , and  $V_{\text{Fsib}}$ ) which can be related to the covariances ( $C$ ) between individuals,  $i$  and  $j$ , assuming a mean is fitted to the population.

$$i, j \text{ no common parent (U),} \quad C_U = 0 \quad (1)$$

$$i, j \text{ paternal half-sibs (PHS),} \quad C_{\text{PHS}} = V_{\text{Sire}} \quad (2)$$

$$i, j \text{ maternal half-sibs (MHS),} \quad C_{\text{MHS}} = V_{\text{Dam}} \quad (3)$$

$$i, j \text{ full-sibs (FS),} \quad C_{\text{FS}} = V_{\text{Sire}} + V_{\text{Dam}} + V_{\text{Fsib}} \quad (4)$$

For this population  $i$  and  $j$  were in generation 22, and Joshi et al. (2018)<sup>1</sup> published the main results with a base set at generation 20.

*Dominance.* Assuming the non-additive genetic variation was primarily arising from dominance then Joshi et al. (2018)<sup>1</sup> showed:

$$C_U = (4\sigma_A^2 + \sigma_D^2)/16 \quad (5)$$

$$C_{\text{PHS}} = (6\sigma_A^2 + 2\sigma_D^2)/16 \quad (6)$$

$$C_{\text{MHS}} = (6\sigma_A^2 + 2\sigma_D^2)/16 + \sigma_M^2 \quad (7)$$

$$C_{\text{FS}} = (8\sigma_A^2 + 4\sigma_D^2)/16 + \sigma_M^2 \quad (8)$$

The fitted mean will account for the genotypic drift from the base generation, which is represented by  $C_U$ , and Equation 5 can be subtracted from the (6), (7) and (8).

$$C_{\text{PHS}} = (2\sigma_A^2 + \sigma_D^2)/16 \quad (9)$$

$$C_{\text{MHS}} = (2\sigma_A^2 + \sigma_D^2)/16 + \sigma_M^2 \quad (10)$$

$$C_{\text{FS}} = (4\sigma_A^2 + 3\sigma_D^2)/16 + \sigma_M^2 \quad (11)$$

Solving these equations and equating them to (2) to (4) results in the following:

---

<sup>1</sup> Joshi R, Woolliams JA, Meuwissen THE, Gj  en HM. Maternal, dominance and additive genetic effects in Nile tilapia; influence on growth, fillet yield and body size traits. *Heredity* (Edinb). 2018;120:452-62.

- $\sigma^2_M$  is estimated as  $C_{MHS} - C_{PHS}$ .
- $\sigma^2_D$  is estimated as  $16(C_{FS} - C_{PHS} - C_{MHS}) = 16V_{Fsib}$
- $\sigma^2_A$  is estimated as  $16C_{PHS} - 8(C_{FS} - C_{MHS}) = 8(V_{Sire} - V_{Fsib})$ .

*Epistasis*<sup>2</sup>. Consider now an assumption that the non-additive genetic variation was primarily arising from A#A, denoted  $\sigma^2_I$ :

$$C_U = (16\sigma^2_A + 4\sigma^2_I)/64 \quad (5)$$

$$C_{PHS} = (24\sigma^2_A + 9\sigma^2_I)/64 \quad (6)$$

$$C_{MHS} = (24\sigma^2_A + 9\sigma^2_I)/64 + \sigma^2_M \quad (7)$$

$$C_{FS} = (32\sigma^2_A + 16\sigma^2_I)/64 + \sigma^2_M \quad (8)$$

As with dominance the fitted mean removes  $C_U$  and this is subtracted from remaining covariances.

$$C_{PHS} = (8\sigma^2_A + 5\sigma^2_I)/64 \quad (6)$$

$$C_{MHS} = (8\sigma^2_A + 5\sigma^2_I)/64 + \sigma^2_M \quad (7)$$

$$C_{FS} = (16\sigma^2_A + 12\sigma^2_I)/64 + \sigma^2_M \quad (8)$$

The solutions to these equations are:

- $\sigma^2_M$  is estimated as  $C_{MHS} - C_{PHS}$ .
- $\sigma^2_I$  is estimated as  $32(C_{FS} - C_{PHS} - C_{MHS}) = 32V_{Fsib}$
- $\sigma^2_A$  is estimated as  $28C_{PHS} - 20(C_{FS} - C_{MHS}) = 8V_{Sire} - 20V_{Fsib} = 8(V_{Sire} - V_{Fsib}) - 12V_{Fsib}$ .

Therefore the estimate of  $\sigma^2_A$  from this design is reduced when the non-additive variation is assumed to be additive-by-additive epistasis rather than dominance, and this reduction is of the order of  $3/8 \sigma^2_I$ .

---

<sup>2</sup> Cockerham CC. An extension of the concept of partitioning hereditary variance for analysis of covariances among relatives when epistasis is present. *Genetics*. Genetics Society of America; 1954;39(6):859-82.
